# Supplementary material
Source: PubMed Central journal article supplement (PMC4134322)
Supplement: NIHMS58242-supplement-1.pdf [file NIHMS58242-supplement-1.pdf]

## Supplementary Material

### **DENR Regulates Tissue Growth and Translation**

### **By Promoting Reinitiation Downstream of uORFs**

Schleich et al.

This file contains a Supplemental Discussion, a complete list of oligos and sequences used, and the number of replicates for each figure panel.

#### **Supplemental Discussion**

##### *Differences between DENR function and the GCN4 paradigm*

Our data reveal several important differences between the mode of action of DENR•MCT-1 and that described for the GCN4-ATF4/5 paradigms: (1) Reinitiation requires the recruitment of a new Met-tRNA<sub>i</sub><sup>Met</sup>, which in all previous models including the GCN4 and ATF4/5 paradigms has been assumed to occur via *de novo* recruitment of the eIF2-containing 'ternary complex' (TC) to a 40S ribosomal subunit that has resumed scanning without an associated Met-tRNA<sub>i</sub><sup>Met</sup>. A key basis for this conclusion is that efficiency of reinitiation typically increases with increasing intercistronic distance, reaching a plateau at about 80nt, presumably because the probability of TC recruitment to a reinitiating 40S subunit is increased by longer scanning time<sup>41-45</sup>. This length-dependence is crucial to regulation of translation of GCN4, mammalian ATF4/5, and other stress-activated genes<sup>41,46,47</sup>. Interestingly, we observe no such length dependence with DENR-dependent reinitiation. Indeed, DENR

promotes reinitiation equally well even at quite short intercistronic distances (compare DENR responsiveness of the 200-375 reporter (~15nt intercistronic distance) to full-length in Figure 2h). Thus, cells have a previously unappreciated means for regulating reinitiation efficiency that is fundamentally different from the TC recruitment timing mechanism that underpins regulation of yeast GCN4 and mammalian ATF4/5. (2) Regulation of GCN4 translation requires multiple cis-regulatory sequences in the GCN4 5'UTR<sup>41</sup>. This is not the case for regulation of mbc by DENR•MCT-1. We deleted sequences upstream of the mbc stuORFs, downstream of the stuORFs, in between the stuORFs, as well as the coding sequences of the stuORFs themselves, none of which had an effect on the ability of DENR•MCT-1 to regulate translation of the mbc reporter. In fact, simply introducing 11 nucleotides comprising a stuORF coding for one amino acid (acaaaATGTAA) is sufficient to impart DENR-dependent translation to a control 5'UTR (Figure 3a-a'), indicating that no additional cis-regulatory elements are needed. (3) The GCN4 5'UTR is a sophisticated setup that allows GCN4 translation to anti-correlate with translation of most other cellular mRNAs. Thus, when eIF2 activity levels drop and translation of most cellular mRNAs also drops, translation of GCN4 will increase, and vice-versa. Hence, translation of GCN4 is not uncoupled from general translation initiation, but rather is designed for co-regulation in an antagonistic manner. In this paradigm, the rate of reinitiation is not uncoupled from the general rate of initiation. In fact, the concomitant drop in efficiency of initiation and reinitiation due to reduced TC activity is key for antagonistically regulating GCN4 compared to other cellular mRNAs. In contrast DENR affects the efficiency of reinitiation relative to standard cap-dependent initiation, as

observed in all the luciferase reporter assays presented here, which feature normalization to a control that is translated by standard cap-dependent initiation. Hence, DENR is a molecular handle that cells can use to uncouple the rate of reinitiation from the rate of initiation.

#### *Role of DENR in regulating cell proliferation*

DENR function appears to be particularly required by cells that are proliferating. Polysome-to-monosome ratios, *de novo* protein synthesis levels, and reinitiation efficiency on stuORFs are all reduced upon DENR knockdown when cells are proliferating, but not when they are quiescent. Accordingly, the strongest developmental defects in DENR<sup>KO</sup> occur in histoblast nests at the onset of metamorphosis, corresponding to the moment when these cells exit quiescence and enter a phase of intense proliferation. Why proliferating cells would be more dependent on DENR is unclear at present, but one interesting possibility could be that DENR•MCT-1 function might be regulated by cellular proliferation status. Indeed, Figure 2i suggests that DENR•MCT-1 function is low by default in quiescent cells. A recent genome wide study in mouse ES cells described decreased uORF translation upon differentiation<sup>12</sup>, which would also suggest that non-proliferating cells might have a lower requirement for reinitiation. Moreover, uORF containing transcripts are significantly enriched in vertebrate proto-oncogenes, nearly two thirds of which produce mRNAs with uORFs<sup>48</sup>. *Drosophila* stuORF transcripts also include growth-promoting kinases such as InR, PDK1 and Abl, suggesting that stuORF regulation might have a conserved function during cell proliferation.

In DENR<sup>KO</sup> animals, the head, thorax and limbs are not as badly affected as the abdomen (Figure 1a). Tissues forming these structures also proliferate at some point in development, so why are they not strongly affected upon DENR loss-of-function? This is likely because, compared to abdominal histoblast cells, these tissues derive from imaginal discs which proliferate earlier in development. At these earlier stages of development, maternally contributed DENR can partially rescue zygotic loss-of-function. Indeed, animals lacking both zygotic and maternal DENR (generated via ovo<sup>D</sup> germline clones) die as embryos.

Consistent with DENR•MCT-1 function being modulated by cellular proliferation status, the effect of DENR loss-of-function on EcR expression also depends on whether cells are proliferating. The EcR gene has two sets of transcript isoforms both of which contain uORFs: the EcR-A isoform, expressed in tissues that are proliferating in early pupae, and the EcR-B isoform, predominantly expressed in tissues that are not proliferating. Although we could detect a clear reduction in EcR-A protein levels in DENR<sup>KO</sup> pupae, we could only observe a minimal reduction in EcR-B protein levels (Figure ED6c) in agreement with DENR function being mainly required in proliferating cells. This observation is supported by the fact that EcR-B levels do indeed drop upon DENR loss-of-function in S2 cells, which are proliferating (Figure 4a). This parallels the effects observed for the mbc reporter in proliferating versus quiescent cells (Figure 2i).

## References for Supplemental Discussion

- 41 Hinnebusch, A. G. Translational regulation of GCN4 and the general amino acid control of yeast. *Annu Rev Microbiol* **59**, 407-450, doi:10.1146/annurev.micro.59.031805.133833 (2005).
- 42 Kozak, M. Effects of intercistronic length on the efficiency of reinitiation by eucaryotic ribosomes. *Molecular and cellular biology* **7**, 3438-3445 (1987).
- 43 Kozak, M. Constraints on reinitiation of translation in mammals. *Nucleic Acids Res* **29**, 5226-5232 (2001).
- 44 Poyry, T. A., Kaminski, A., Connell, E. J., Fraser, C. S. & Jackson, R. J. The mechanism of an exceptional case of reinitiation after translation of a long ORF reveals why such events do not generally occur in mammalian mRNA translation. *Genes Dev* **21**, 3149-3162, doi:21/23/3149 (2007).
- 45 Poyry, T. A., Kaminski, A. & Jackson, R. J. What determines whether mammalian ribosomes resume scanning after translation of a short upstream open reading frame? *Genes Dev* **18**, 62-75, doi:10.1101/gad.276504 (2004).
- 46 Spriggs, K. A., Bushell, M. & Willis, A. E. Translational regulation of gene expression during conditions of cell stress. *Mol Cell* **40**, 228-237, doi:S1097-2765(10)00756-2 (2010).
- 47 Jackson, R. J., Hellen, C. U. & Pestova, T. V. The mechanism of eukaryotic translation initiation and principles of its regulation. *Nature reviews. Molecular cell biology* **11**, 113-127, doi:nrm2838 (2010).

48 Kozak, M. An analysis of 5'-noncoding sequences from 699 vertebrate messenger RNAs. *Nucleic Acids Res* **15**, 8125-8148 (1987).

## Oligo sequences

For fly knockout generation:

| Purpose                               | 5' oligo                                   | 3' oligo                                  |
|---------------------------------------|--------------------------------------------|-------------------------------------------|
| Amplification of the upstream flank   | CCGGGCGGCCGCAACTAAATACAAAA<br>TACA         | CCGGGCGGCCGCTGCGGATCGGAT<br>TAACTG        |
| Amplification of the downstream flank | CCGGGCGGCCGCGGCGCGCCGTGAGT<br>TCGTCTTCAAAC | CCGGGCGGCCGCGGCGCGCCAGC<br>TGTGGGAGCCGGCG |

Oligos for dsRNA generation for S2 cell knockdowns

| Purpose       | 5' oligo                                               | 3' oligo                                                  |
|---------------|--------------------------------------------------------|-----------------------------------------------------------|
| lacZ          | CCGGTAATACGACTCACTATAGGGACAGGG<br>CGCGTCCCATT          | CCGGTAATACGACTCACTATAGGG<br>GCTATGACCATGATTACGCCAAGC      |
| GFP           | CCGGTAATACGACTCACTATAGGGACCCCTC<br>GTGACCACCCTGACCTAC  | CCGGTAATACGACTCACTATAGGG<br>GACCATGTGATCGCGCTTCTCGT       |
| DENR          | CCGGTAATACGACTCACTATAGGGAGGCGT<br>CACCTATCCGATCCAGATGA | CCGGTAATACGACTCACTATAGGG<br>AGGCGGTATGACATCGAACAAGT<br>CA |
| MCT-1         | CCGGTAATACGACTCACTATAGGGAGGCCA<br>CATCGAACTGCTGCTAA    | CCGGTAATACGACTCACTATAGGG<br>AGGTGGATAACGTGAGGAGTCCA       |
| Ligatin/eIF2D | TAATACGACTCACTATAGGGGCTCCTGTGA<br>CCTTCGCTAC           | TAATACGACTCACTATAGGGTAAA<br>GTTCCACCACTTCGGGG             |
| MCT1 3'UTR    | GGCCTAATACGACTCACTATAGGGCGAAAT<br>AGGAATCTGCACTTGC     | GGCCTAATACGACTCACTATAGGA<br>CCGCCAAACAGAAGACTCAATG        |
| CG10498       | GGGGGGCACCCAAATGTGGTCCAAC                              | GGGGGGCGATGCAGGATACGATT                                   |

Oligos for mbc luciferase reporter cloning

| Purpose               | Used in Figure:     | 5' oligo                           | 3' oligo                              |
|-----------------------|---------------------|------------------------------------|---------------------------------------|
| mbc promoter + 5'UTR  | ED2b                | CCGGAGATCTGAATGTGTGG<br>AAAATGTATT | CCGGTTCGAAGTCATCTTGAAGGC<br>TTTTCTTCT |
| mbc full-length 5'UTR | 2E-I, 3A'-C, ED2E-H | CCGGCTGCAGAGTACGGTAC<br>TTCTGGGC   | CCGGTTCGAAGTCATCTTGAAGGC<br>TTTTCTTCT |
| mbc 5'UTR 100-575     | ED2e                | CCGGCTGCAGCACACACGAG<br>TGTGT      | CCGGTTCGAAGTCATCTTGAAGGC<br>TTTTCTTCT |
| mbc 5'UTR 200-575     | ED2e                | CCGGCTGCAGGCGAAAAACG<br>GCGCA      | CCGGTTCGAAGTCATCTTGAAGGC<br>TTTTCTTCT |
| mbc 5'UTR 300-575     | ED2e                | CCGGCTGCAGGCTTTTCGTC<br>GAAAT      | CCGGTTCGAAGTCATCTTGAAGGC<br>TTTTCTTCT |
| mbc 5'UTR             | ED2e                | CCGGCTGCAGCGTTGCCTAA<br>TTTAA      | CCGGTTCGAAGTCATCTTGAAGGC<br>TTTTCTTCT |

|                                                                                        |          |                                                               |                                                               |
|----------------------------------------------------------------------------------------|----------|---------------------------------------------------------------|---------------------------------------------------------------|
| 400-575                                                                                |          |                                                               |                                                               |
| mbc 5'UTR<br>500-575                                                                   | ED2E     | CCGGCTGCAGAAGTCGGCGC<br>AAAAA                                 | CCGGTTCGAAGTCATCTTGAAGGC<br>TTTTCTTCT                         |
| mbc 5'UTR<br>233-425                                                                   | ED2G     | CCGGCTGCAGACAATTTGTG<br>CGGAA                                 | CCGGTTCGAAGTCATCTTCAACAA<br>GACATTAAATTA                      |
| mbc 5'UTR<br>266-425                                                                   | ED2G     | CCGGCTGCAGTAATTATTTA<br>TTGGTT                                | CCGGTTCGAAGTCATCTTCAACAA<br>GACATTAAATTA                      |
| mbc 5'UTR<br>200-500                                                                   | ED2F     | CCGGCTGCAGGCGAAAAACG<br>GCGCA                                 | CCGGTTCGAAGTCATCTTTTACCA<br>CCAACACGGCGA                      |
| mbc 5'UTR<br>200-425                                                                   | ED2G     | CCGGCTGCAGGCGAAAAACG<br>GCGCA                                 | CCGGTTCGAAGTCATCTTCAACAA<br>GACATTAAATTA                      |
| mbc 5'UTR<br>200-400                                                                   | ED2G     | CCGGCTGCAGGCGAAAAACG<br>GCGCA                                 | CCGGCTGCAGCGTTGCCTAATTTA<br>A                                 |
| mbc 5'UTR<br>200-375                                                                   | 2H, ED2G | CCGGCTGCAGGCGAAAAACG<br>GCGCA                                 | CCGGTTCGAAGTCATCTTTTTTGA<br>TTTCGTTTTTAC                      |
| mbc 5'UTR<br>200-350                                                                   | ED2F     | CCGGCTGCAGGCGAAAAACG<br>GCGCA                                 | CCGGTTCGAAGTCATCTTCCAACA<br>CAAGCATTTTCGC                     |
| mbc 5'UTR<br>200-275                                                                   | ED2F     | CCGGCTGCAGGCGAAAAACG<br>GCGCA                                 | CCGGTTCGAAGTCATCTTTAAATA<br>ATTATTGCACAA                      |
| mbc 5'UTR<br>ATG mutation<br>T219A                                                     | 2E       | AAACGGCGCAAAAAGCATTT<br>GCGGAG                                | CTCCGCAAATGCTTTTTGCGCCGT<br>TT                                |
| mbc 5'UTR<br>ATG mutation<br>A249G                                                     | 2E       | AATTTGTGCGGAGTGCTAGC<br>TTTTGT                                | ACAAAAGCTAGCACTCCGCACAAA<br>TT                                |
| mbc 5'UTR<br>ATG mutation<br>A338T                                                     | 2E       | AATCGGAGGCGAATTGCTTG<br>TGTTGG                                | CCAACACAAGCAATTCGCCTCCGA<br>TT                                |
| mbc 5'UTR<br>Kozak<br>mutation 218                                                     | 2F       | GAGCGAAAAACGGCGGTGTA<br>TGCATTTGCGGAGC                        | GCTCCGCAAATGCATACACCGCGG<br>TTTTTCGCTC                        |
| mbc 5'UTR<br>Kozak<br>mutation 248                                                     | 2F       | AGCGACAATTTGTGGTGTAT<br>GCTAGCTTTTGT                          | ACAAAAGCTAGCATAACCCACAAA<br>TTGTGCT                           |
| mbc 5'UTR<br>Kozak<br>mutation 338                                                     | 2F       | AGCGAAATCGGAGGGTGTAT<br>GCTTGTGTTGGC                          | GCCAACACAAGCATAACCCCTCCG<br>ATTTGCT                           |
| mbc 5'UTR<br>CDS swap<br>uORF 249                                                      | 2G       | TTTGTGCGGAATGCAACAAC<br>ACAACAATAATTATTTAT                    | ATAAATAATTATTGTTGTTGTTGT<br>TGCATTCCGCACAAA                   |
| mbc 5'UTR<br>CDS swap<br>uORF 339                                                      | 2G       | CGGAGGCGAAATGCAACAAC<br>ACAACAACAATGAAAACGA<br>AATC           | GATTTGTTTTTCATTGTTGTTGTT<br>GTTGTTGCATTTTCGCTCCG              |
| mbc 5'UTR<br>CDS swap<br>uORF 219<br>(into already<br>mutated<br>uORF249<br>construct) | 2G       | ACGGCGCAAAAATGCAACAAC<br>ACAACAACAACAACAACAA<br>ATGCAACAACAAC | GTTGTTGTTGCATTTGTTGTTGTT<br>GTTGTTGTTGTTGTTGCATTTTGC<br>GCCGT |
| mbc 5'UTR                                                                              | 2H       | AGCTTTTGTGCAATTATTAT                                          | ACCAATAAATAATAATTGCACAAA                                      |

|                                         |                  |                                             |                                                |
|-----------------------------------------|------------------|---------------------------------------------|------------------------------------------------|
| stop codon mutation 268                 |                  | TTATTGGT                                    | AGCT                                           |
| mbc 5'UTR stop codon mutation 360       | 2H               | CCGGCTGCAGGCGAAAAACG<br>GCGCA               | CCGGTTCGAAGTCATCTTTTTTGA<br>TTTCGTTTTCCCAATGCC |
| mbc 5'UTR remove sequence between uORFs | "data not shown" | CTAGCTTTTGTGCAATAAGA<br>CGTCGAAATGCTTGTGTTG | CAACACAAGCATTTCGACGTCTTA<br>TTGCACAAAAGCTAG    |

### Oligos for 5'UTR luciferase reporter cloning

| Purpose | Used in Figure: | 5' oligo                           | 3' oligo                                    |
|---------|-----------------|------------------------------------|---------------------------------------------|
| EcR-RB  | 3B              | CCGGCTGCAGATTTAGTATTT<br>TTTTG     | CCGGTTCGAAGTCATCTTCTCTG<br>GCAGCCGATA       |
| gfa     | 3B              | CCGGCTGCAGAGTTGCAGTTG<br>GAAAGTC   | CCGGTTCGAAGTCATCTTTATTCT<br>ATATCCTATATT    |
| TyrR    | 3B              | CCGGCTGCAGCGCCGGCTTAC<br>CTGATCGA  | CCGGTTCGAAGTCATCTTGGATCG<br>GCCAGTTGGGTTC   |
| CG3558  | 3B              | CCGGCTGCAGGCTGCTCATCG<br>CTAACTTTC | CCGGTTCGAAGTCATCTTTTGTCTG<br>GTGCGGTGTGTGTG |
| snoo-RB | 3B              | CCGGCTGCAGTGCAAAAATAA<br>TTTGCA    | CCGGATCGATGTCATCTTTTTTGG<br>GCAATACTTT      |
| InR-RA  | 3B              | CCGGCTGCAGGGCTTGTCCGG<br>GTGT      | CCGGTTCGAAGTCATCTTATTGCG<br>GTGTTTCTA       |
| janB    | 3C              | CCGGCTGCAGTAGCTTTGCAA<br>CTGCTCG   | CCGGTTCGAAGTCATCTTTTTTATT<br>TAACCAAAGGAA   |
| CG8963  | 3C              | CCGGCTGCAGAAAATAATAAAT<br>TTAACA   | CCGGTTCGAAGTCATCTTGTTTTTC<br>GAGTCCAACGCA   |
| psh     | 3C              | CCGGCTGCAGCGGTCAGAACC<br>GTCGTCC   | CCGGTTCGAAGTCATCTTCTTAAT<br>TCGCTTCGACAC    |
| drm     | 3C              | CCGGCTGCAGAGTTATTAGTA<br>GCATTCA   | CCGGTTCGAAGTCATCTTTTTGAC<br>AGGCGGTATGTG    |
| Rbp6-RC | 3C              | CCGGCTGCAGCCTTCAGTCGT<br>TATCAGA   | CCGGATCGATGTCATCTTAACGAG<br>CTTCTTTGTTGG    |
| CG43674 | 3C              | CCGGCTGCAGCATTCTGTTA<br>GAGTGCT    | CCGGTTCGAAGTCATCTTGGCTGG<br>CTAAAGCGCCTT    |

### Oligos for generating plasmids for making reporter mRNAs by in vitro transcription reactions

| Purpose                                       | Used in Figure: | 5' oligo                                                    | 3' oligo                                  |
|-----------------------------------------------|-----------------|-------------------------------------------------------------|-------------------------------------------|
| actin 5'UTR into RLuc (control)               | ED2 C-D         | GGCCAGATCTTAATACGACTCA<br>CTATAGGCATATCACTACCGTT<br>TGAGTTC | GGCCTTCGAAGTCATTTTGTAAGA<br>TTTGGTGTGTTTT |
| actin 5'UTR into FLuc (normalization control) | ED2 C-D         | GGCCAGATCTTAATACGACTCA<br>CTATAGGCATATCACTACCGTT<br>TGAGTTC | GGCCCCATGGTTTGTAAGATTTGG<br>TGTGTTTT      |
| mbc 5'UTR                                     | ED2 C-D         | CCGGAGATCTTAATACGACTCA<br>CTATAGGAGTACGGTACTTCTG            | CCGGTTCGAAGTCATCTTGAAGGC<br>TTTTCTTCT     |



### Oligos for introducing synthetic uORFs into a control 5'UTR

| Purpose                                                     | Used in Figure               | 5' oligo                                             | 3' oligo                                               |
|-------------------------------------------------------------|------------------------------|------------------------------------------------------|--------------------------------------------------------|
| mutagenizing CG43674 5'UTR to introduce SpeI and AgeI sites | 3A-A', ED5A, ED10E, ED10F -G | TCTGTTAAAGAAAACTAGTGTG ACCGGTAATTAAAATAATTACTA G     | CTAGTAATTATTTTAATTACCGGT CACACTAGTTTTTCTTTAACAGA       |
| 1 aa                                                        | 3A-A', ED5A, ED10E, ED10F -G | CTAGTGTGTCCGGACAAAATGTA AGCCGCCGCCGCCGCCGCCGCCG CCA  | CCGGTGGCGGCGGCGGCGGCGGCGG GCGGCTTACATTTTGTCCGGACAC A   |
| 4 aa                                                        | 3A-A'                        | CTAGTGTGTCCGGACAAAATGGC CGCCGCCTAAGCCGCCGCCGCCG CCA  | CCGGTGGCGGCGGCGGCGGCGGCTTAG GCGGCGGCCATTTTGTCCGGACAC A |
| 9 aa                                                        | 3A-A'                        | CTAGTGTGTCCGGACAAAATGGC CGCCGCCGCCGCCGCCGCCGCCCT AAA | CCGGTTTAGGCGGCGGCGGCGGCGGCG GCGGCGGCCATTTTGTCCGGACAC A |

### Oligos for inducible stuORF and control luciferase reporter cloning

| Purpose                                                      | Used in Figure | 5' oligo                        | 3' oligo                     |
|--------------------------------------------------------------|----------------|---------------------------------|------------------------------|
| Fluc ORF                                                     | ED7            | ACCGAATTCGAGATGGAAGACG CCAAAAAC | AACCTCGAGTTACACGGCGATCT TTCC |
| Subcloning of the control and 1 aa uORF synthetic constructs | ED7            | CCGGAATTCATTTCTGTTAGA GTGCT     | TCATAAACTTTTGAAGTC           |

### Oligos for generating the plasmid for the inducible MCT-1 stable cell line

| Purpose   | Used in Figure | 5' oligo                                      | 3' oligo                                  |
|-----------|----------------|-----------------------------------------------|-------------------------------------------|
| MCT-1 ORF | ED10 c         | CACGGTACCGAATTCACCATGG CGTTCAAAAAATTCGAAGAGAA | CACGCGGCCGCTTACTCGAGCTT CACGGGCTTCGACTTCC |

### Oligos for quantitative RT-PCR

| Gene                 | Used in Figure                        | 5' oligo            | 3' oligo           |
|----------------------|---------------------------------------|---------------------|--------------------|
| rp49 (norm. control) | 2B',4C, ED1F,E D2D-D',ED6A -C', ED7G' | GCTAAGCTGTGCGCACAAA | TCCGGTGGGCAGCATGTG |
| mbc                  | 2B-C, ED2D',E D10A'                   | CCGCAACTCTGTTGAAACC | CGGGGTCCAATCCATGTT |

|                   |                      |                               |                                |
|-------------------|----------------------|-------------------------------|--------------------------------|
| InR               | ED6A',E<br>D6C'      | TCCCCAGCGAAAAATTAAG           | GACTATGTCGGCAAATTTCTT          |
| EcR               | ED6C'                | GGACCAGATCACGTTACTAAAG<br>GC  | GCAGGTCTTCAATGTTATCAGCC        |
| Br-C              | 4C                   | AGGAGATCGGCGACGGAC            | TTGAGACCTAGCAACGCTGAG          |
| E75               | ED6B                 | GCAGCAGCAGATCGGAATACTC        | CCGACTCAATGCCCCGAATCC          |
| DENR              | ED1B,1<br>F          | CACGATGCCCATTGAGTAC           | CGGCAGCCTCCTCCTCAA             |
| RLUC              | ED2D'                | GGGTGCTTGTTTGGCATTTC          | GGCCATTCATCCCATGATTC           |
| MCT1              | ED7G'                | GAGGCCTATCCCAAGTTG            | CGATGTGGTCATGGCACT             |
| 18S rRNA          | ED5D-<br>D'          | CGGAGAGGGAGCCTGAGAA           | AGCTGGGAGTGGGTAATTTACG         |
| 28S rRNA          | ED5D-<br>D'          | GAAATCCGCTAAGGAGTGTGTA<br>ACA | CAACTTAAGCGCCATCCATTTT         |
| Initiator<br>tRNA | ED4E,<br>ED5D-<br>D' | AGCAGAGTGGCGCAGTGGAAAGC       | TAGCAGAGCAAGGTTTCGATCCTC<br>GG |

### Oligos for RT-PCR with crosslinked RNA

| Gene              | Used<br>in<br>figure | 5'oligo                 | 3'Oligo                        |
|-------------------|----------------------|-------------------------|--------------------------------|
| Rps13             | ED4E                 | CCCTCCAAAATCGGCATC      | GCGACGGCCTTCTTGATC             |
| Cdc2              | <u>ED4E</u>          | ATCAACCGCGATCAGAGA      | GGCAGCGAATCCATGTAT             |
| InR               | <u>ED4E</u>          | TCCCCAGCGAAAAATTAAG     | GACTATGTCGGCAAATTTCTT          |
| RPL32             | <u>ED4E</u>          | ATGACCATCCGCCAGCATACA   | TGCGCTTGTTTCGATCCGTAACa        |
| mbc               | <u>ED4E</u>          | GGATGGAAAGGTTAAGGAG     | CGTCTTGGGACCACTTAGA            |
| Initiator<br>tRNA | <u>ED4E</u>          | AGCAGAGTGGCGCAGTGGAAAGC | TAGCAGAGCAAGGTTTCGATCCTC<br>GG |

### Oligos for reporter fly lines

|                                                | Used<br>in<br>figure | 5'Oligo                                       | 3'oligo                           |
|------------------------------------------------|----------------------|-----------------------------------------------|-----------------------------------|
| CG43674<br>(control and<br>stuORF<br>reporter) | ED8<br>and<br>ED9    | CCGGGGTACCCATTTCTGTTA<br>GAGTGCT              | CCGGGGATCCGGCTGGCTAA<br>AGCGCCTTT |
| RFP                                            | ED9                  | CCGGGGATCCACCGGTCGCCACCA<br>TGGCCTCCTCCGAGGAC | CCGGGCGGCCGCTTAGGCGCCGGT<br>GGAGT |

## Oligos for Rescue experiments with MCT1 Luciferase assay

|                 | <b>Used<br/>in<br/>Experi<br/>ment</b> | <b>5' Oligo</b>                          | <b>3' Oligo</b>                          |
|-----------------|----------------------------------------|------------------------------------------|------------------------------------------|
| MCT1            | ED10E                                  | CCGGGGTACCATGTTCAAAAAATT<br>CGAA         | CCGGGCGGCCGCTACTTCACGGG<br>CTTCGA        |
| T82A            | ED10E                                  | GGCCCCTGGATGCCTGCCCTGCGC<br>CTCCTGC      | GCAGGAGGCGCAGGGCAGGCATCC<br>AGGGGCC      |
| TS118/1<br>19AA | ED10E                                  | ATGTGTCCCGGCCTCGCCGCCCA<br>GGCGCCTGTATG  | CATACAGGCGCCTGGGGCGGCGAG<br>GCCGGGACACAT |
| T125A           | ED10E                                  | CCAGGCGCCTGTATGGCCCCGGCC<br>GACAAGGAC    | GTCCTTGTCGGCCGGGGCCATACA<br>GGCGCCTGG    |
| T118A           | ED10E                                  | ATGTGTCCCGGCCTCGCCTCGCCA<br>GGCGCCTGTATG | CATACAGGCGCCTGGCGAGGCGAG<br>GCCGGGACACAT |
| S119A           | ED10E                                  | ATGTGTCCCGGCCTCACAGCCCCA<br>GGCGCCTGTATG | CATACAGGCGCCTGGGGCTGTGAG<br>GCCGGGACACAT |

## Number of Replicates for figure data

| Figure | Number of replicates (n=) |
|--------|---------------------------|
| 1d     | 3                         |
| 1e     | 3                         |
| 1f     | 5                         |
| 1g     | 4                         |
| 1h     | 3-4                       |
| 1i     | 4                         |
| 1i'    | 4                         |
| 2a     | 3                         |

|       |                       |
|-------|-----------------------|
| 2b'   | 3                     |
| 2c    | Already on the figure |
| 2e    | 3                     |
| 2f    | 3                     |
| 2g    | 3                     |
| 2h    | 3                     |
| 2i    | 3                     |
| 3a'   | 3                     |
| 3b    | 3                     |
| 3c    | 3                     |
| 4c    | 3                     |
| 4d    | 20-40                 |
| 4e    | Already on the figure |
| ED1c  | 3                     |
| ED1e  | 10-20                 |
| ED1g  | 3                     |
| ED1o  | 3                     |
| ED1q  | 4                     |
| ED1r  | 4                     |
| ED2b  | 3                     |
| ED2c  | 3                     |
| ED2d  | 3                     |
| ED2d' | 3                     |
| ED2e  | 3                     |

|       |                       |
|-------|-----------------------|
| ED2f  | 3                     |
| ED2g  | 3                     |
| ED2h  | 3                     |
| ED3c  | 10                    |
| ED4g  | 3                     |
| ED5a  | 3                     |
| ED5d  | Already on the figure |
| ED5d' | Already on the figure |
| ED6a  | 3                     |
| ED6a' | 3                     |
| ED6b  | 3                     |
| ED6c' | 3                     |
| ED6d  | 20-40                 |
| ED7c  | 3                     |
| ED7d  | On the figure         |
| ED7e  | On the figure         |
| ED7f  | 3                     |
| ED7f' | 3                     |
| ED7h' | 3                     |
| ED10d | 4                     |
| ED10e | 3                     |
| ED10f | 3                     |
