# Supplementary material
Source: PubMed Central journal article supplement (PMC4134322)

**a**

Control Reporter  
(integrated in VK33 at 65B2)

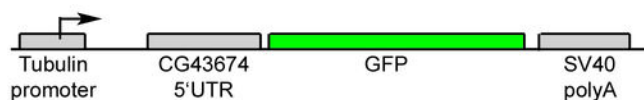

stuORF Reporter  
(integrated in VK33 at 65B2)

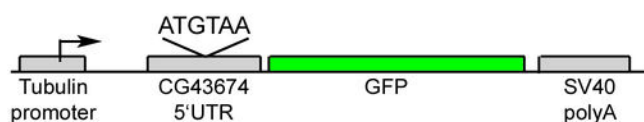**b**

short exposure

Control Reporter  
DENR<sup>+/+</sup> Background

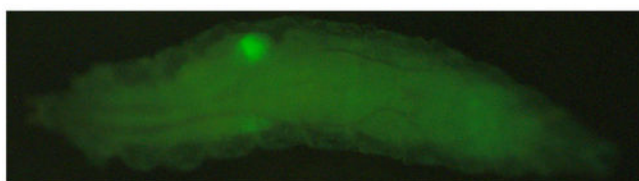

Control Reporter  
DENR<sup>KO</sup> Background

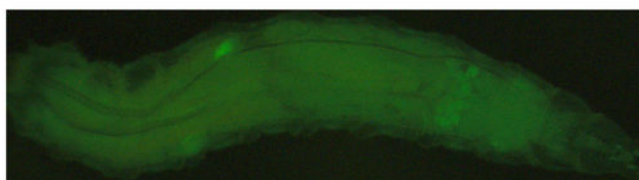

stuORF Reporter  
DENR<sup>+/+</sup> Background

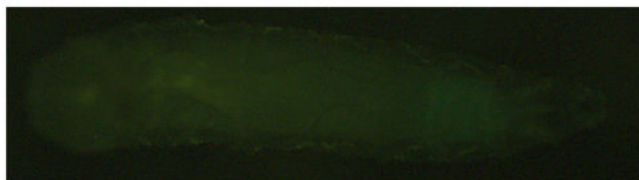

long exposure

stuORF Reporter  
DENR<sup>+/+</sup> Background

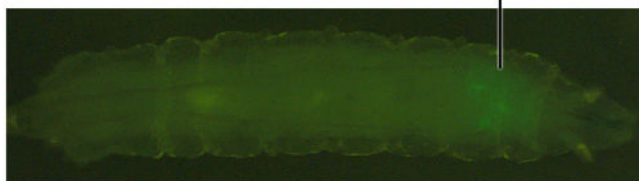

stuORF Reporter  
DENR<sup>KO</sup> Background

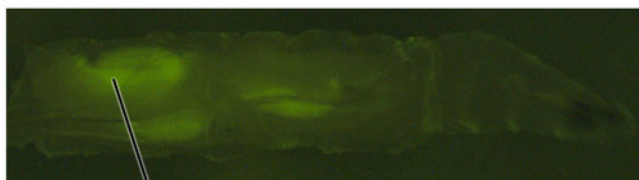**c**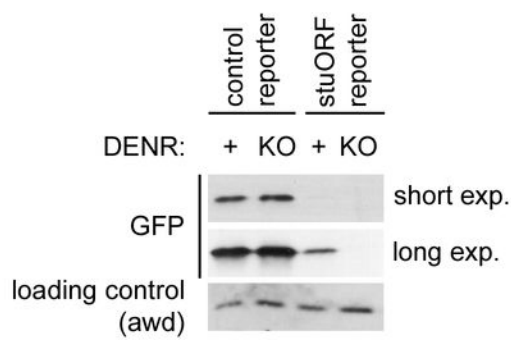

Supplement: NIHMS58242-supplement-ED_Fig8.pdf [file NIHMS58242-supplement-ED_Fig8.pdf]
