# Supplementary material
Source: PubMed Central journal article supplement (PMC4134322)

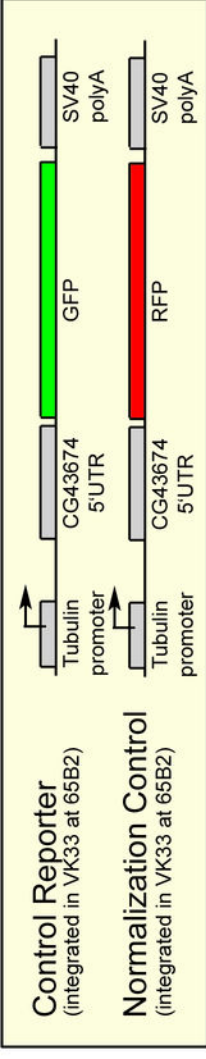

**a**

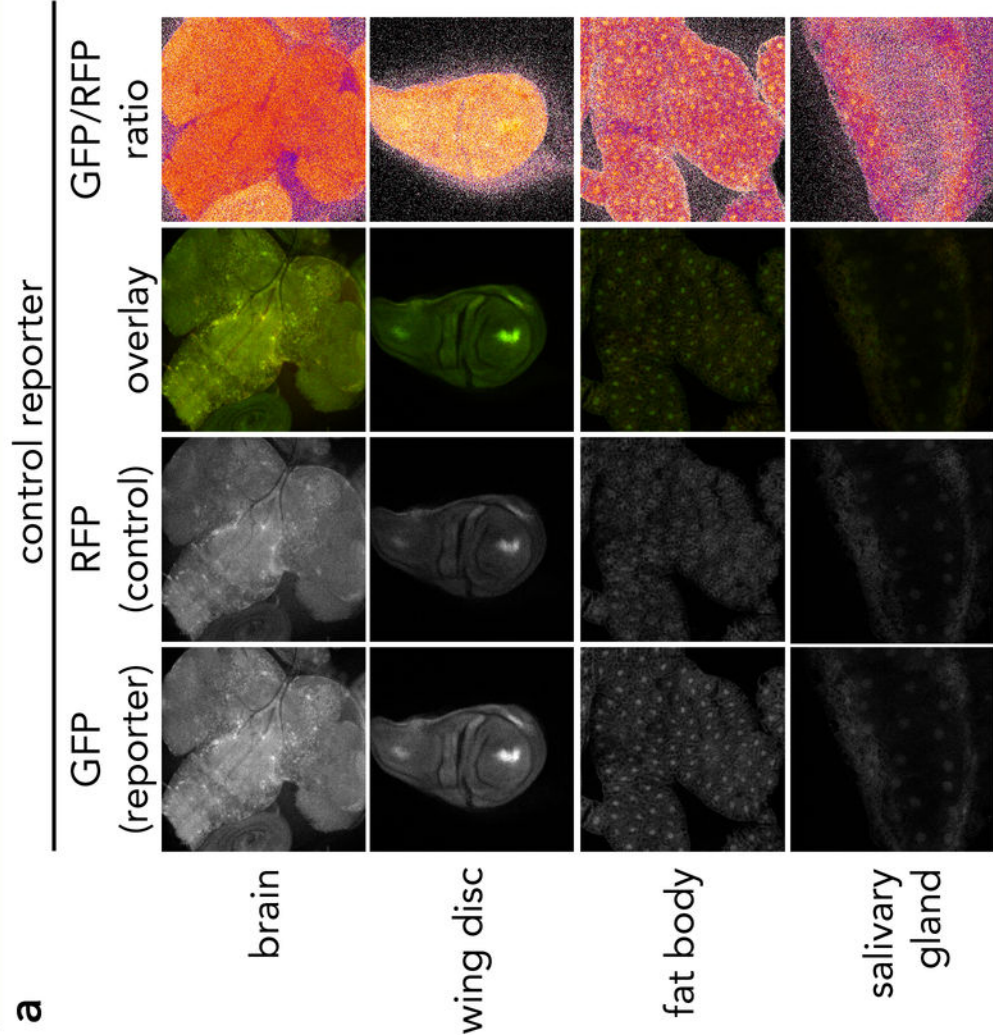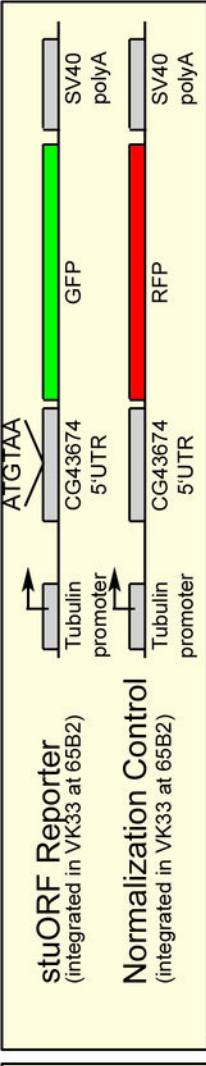

**b**

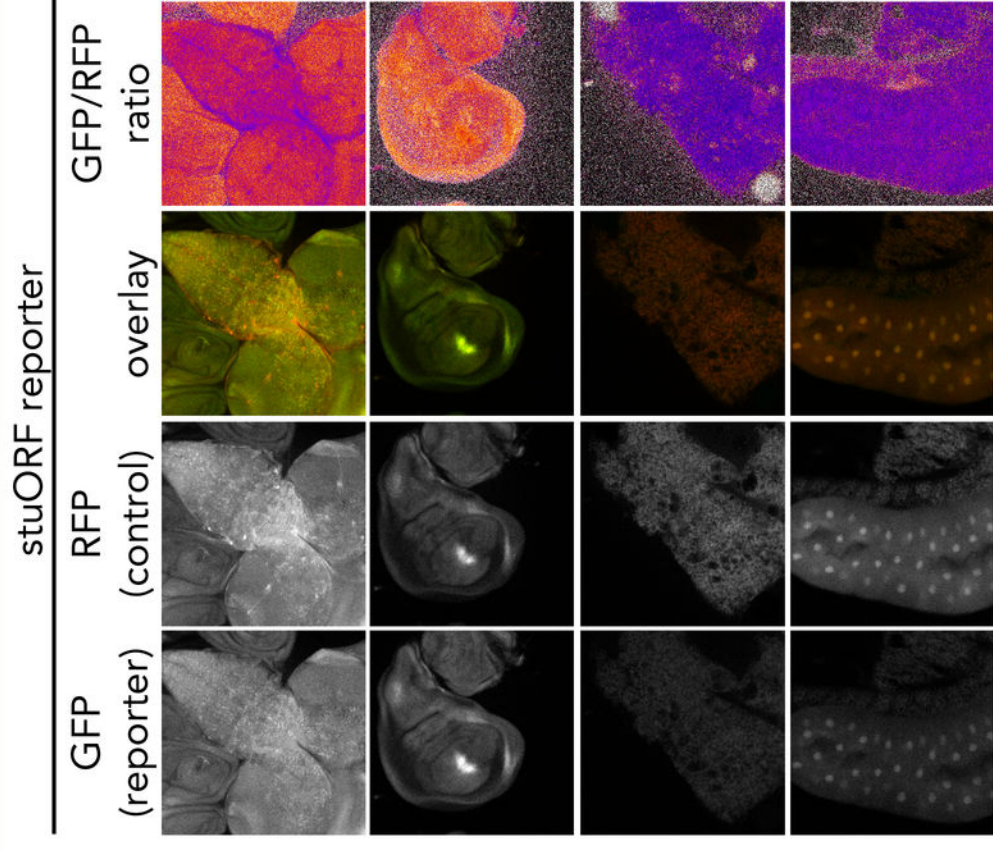

Supplement: NIHMS58242-supplement-ED_Fig9.pdf [file NIHMS58242-supplement-ED_Fig9.pdf]
